# Supplementary material for: Age at Initiation of Cigarette Use in a Nationally Representative Sample of US Youth, 2013-2017
Source: PubMed Central journal article supplement (PMC7910812; doi:10.1001/jamanetworkopen.2021.0218), 2021-02-26
Supplement: jamanetwopen-e210218-s001.pdf [file jamanetwopen-e210218-s001.pdf]

## Supplementary Online Content

Pérez A, N'hpang RS, Callahan E, et al. Age at initiation of cigarette use in a nationally representative sample of US youth, 2013-2017. *JAMA Netw Open*. 2021;4(2):e210218. doi:10.1001/jamanetworkopen.2021.0218

**eFigure 1.** Estimated Age of Initiation of Cigarette Use Outcomes

**eFigure 2.** Estimated Age of Initiation of Cigarette Use Outcomes by Sex

**eFigure 3.** Estimated Age of Initiation of Cigarette Use Outcomes by Race/Ethnicity

This supplementary material has been provided by the authors to give readers additional information about their work.

**eFigure1.** Estimated Age of Initiation of Cigarette Use Outcomes

(a) Susceptibility to Cigarette Initiation

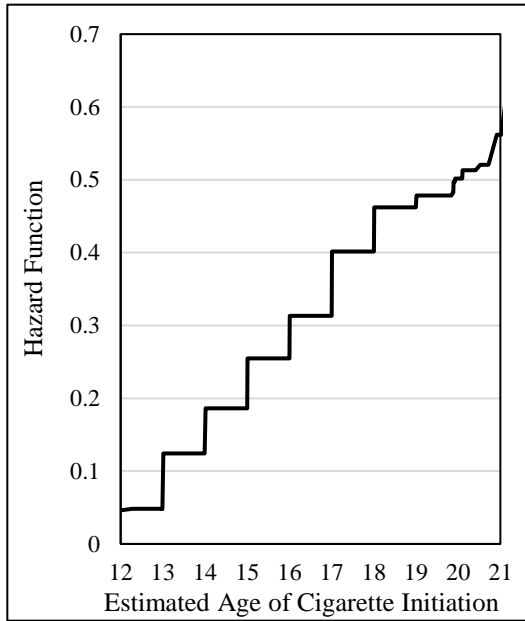

(b) Ever Cigarette Initiation

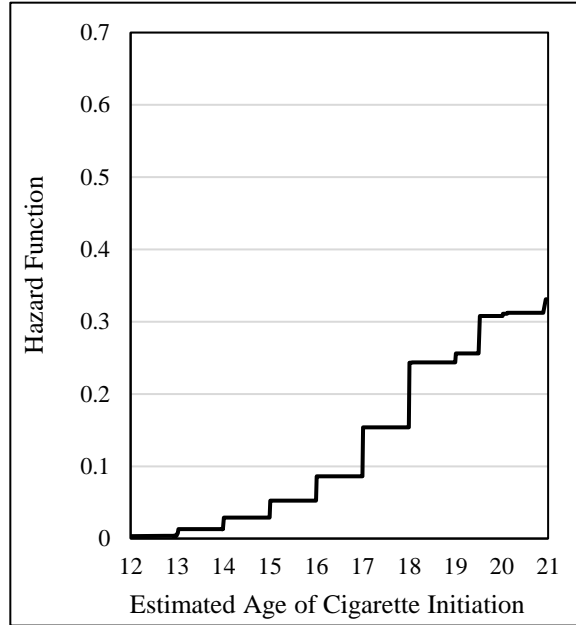

(c) Past 30-day Cigarette Initiation

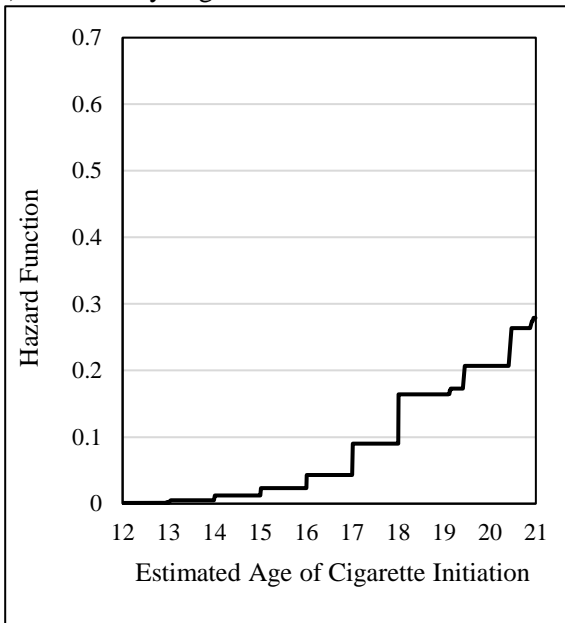

(d) Fairly Regular Cigarette Initiation

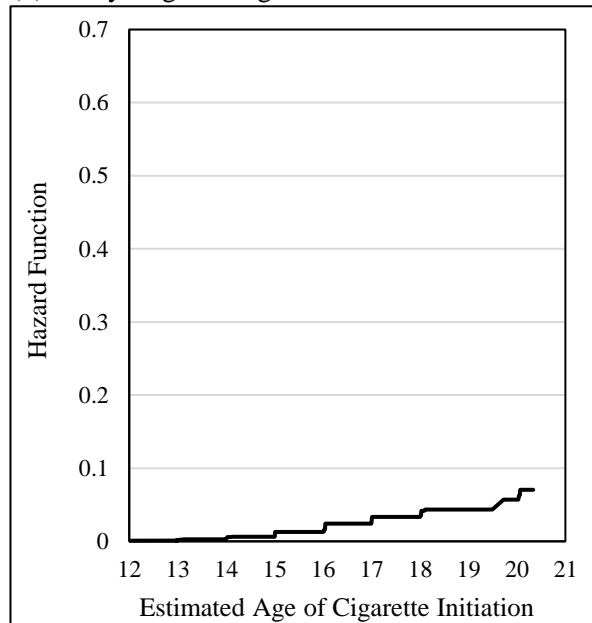

**eFigure 2.** Age of Initiation of Cigarette Use Outcomes by Sex

(a) Ever Cigarette Initiation

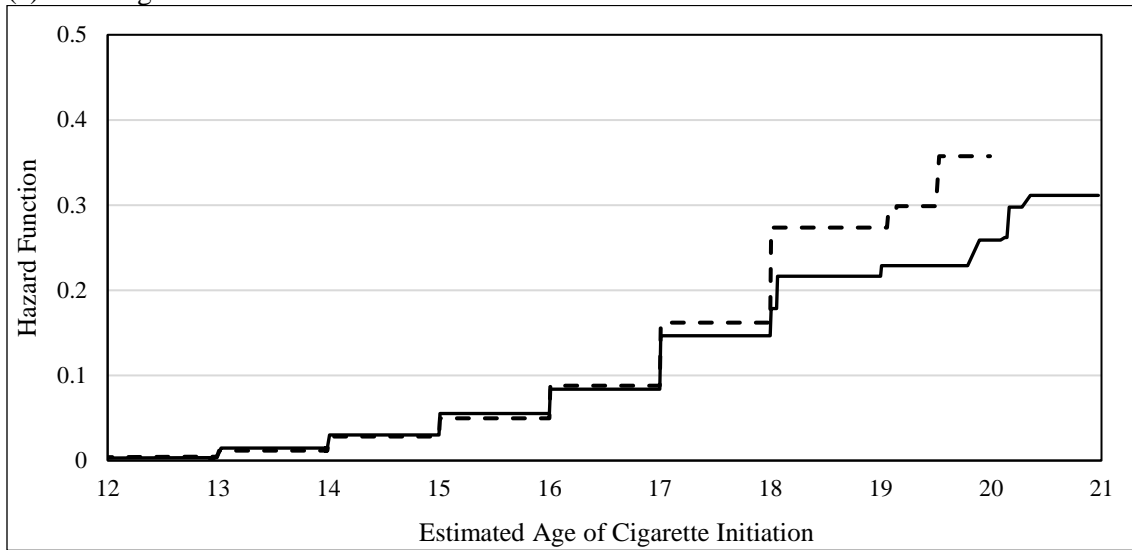

(b) Past 30-Day Cigarette Initiation

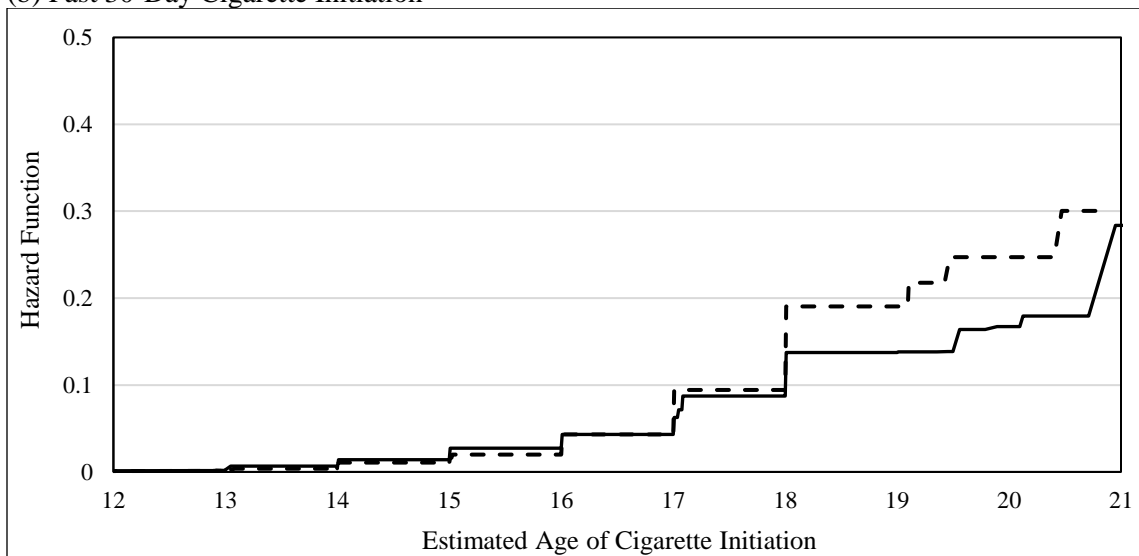

-- Male    — Female

**eFigure3.** Age of Initiation of Cigarette Use Outcomes by Race/Ethnicity.

(a) Susceptibility to cigarette initiation

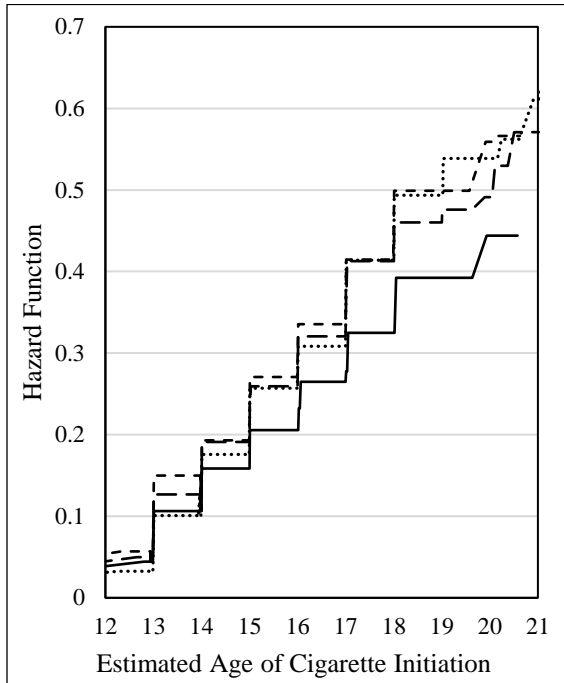

(b) Ever Cigarette Initiation

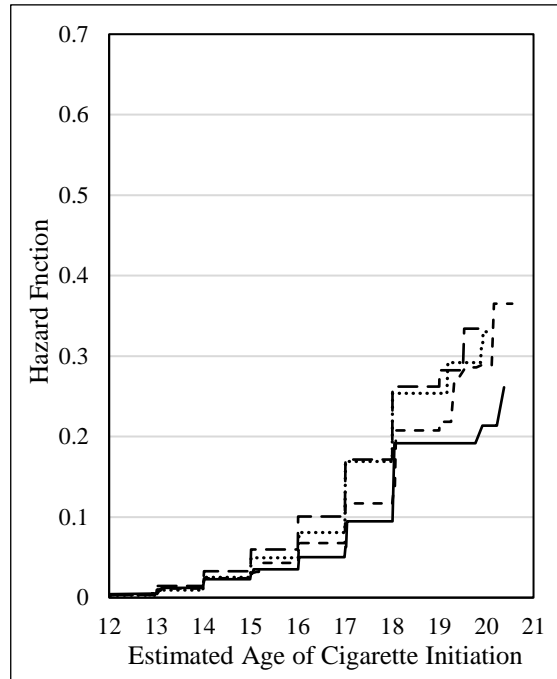

(c) Past 30-day Cigarette Initiation

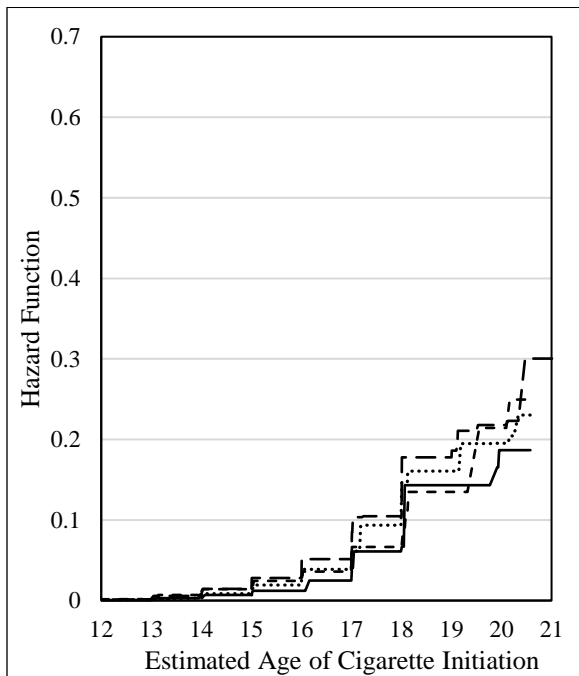

(d) Fairly Regular Cigarette Initiation

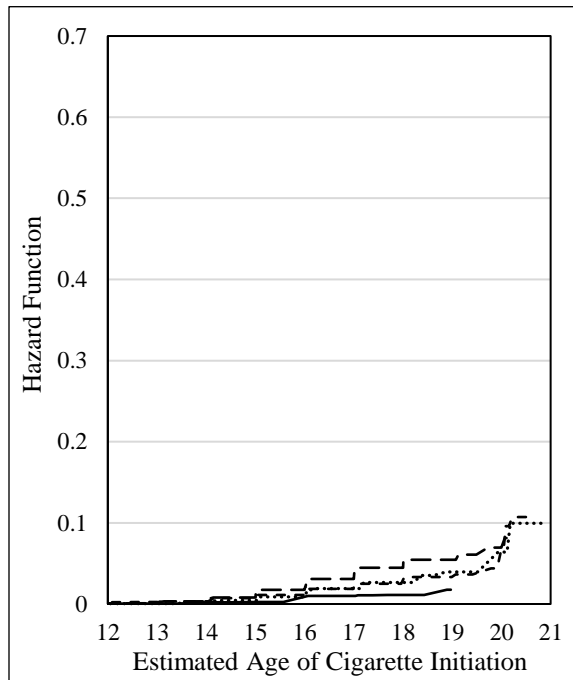

..... Hispanics    — Non-Hispanic Blacks    -.-.- Non-Hispanic Asians/Others    ---- Non-Hispanic Whites
